# Supplementary material for: Spatiotemporal Analysis of Electronic Cigarette Perception on Twitter/X Using Natural Language Processing
Source: Research Square preprint supplement (doi:10.21203/rs.3.rs-8981892/v1), 2026-03-17
Supplement: Supplementary file 1 [file 215964eefbe3c8cdfaacd409.docx]

**Supplementary Information**


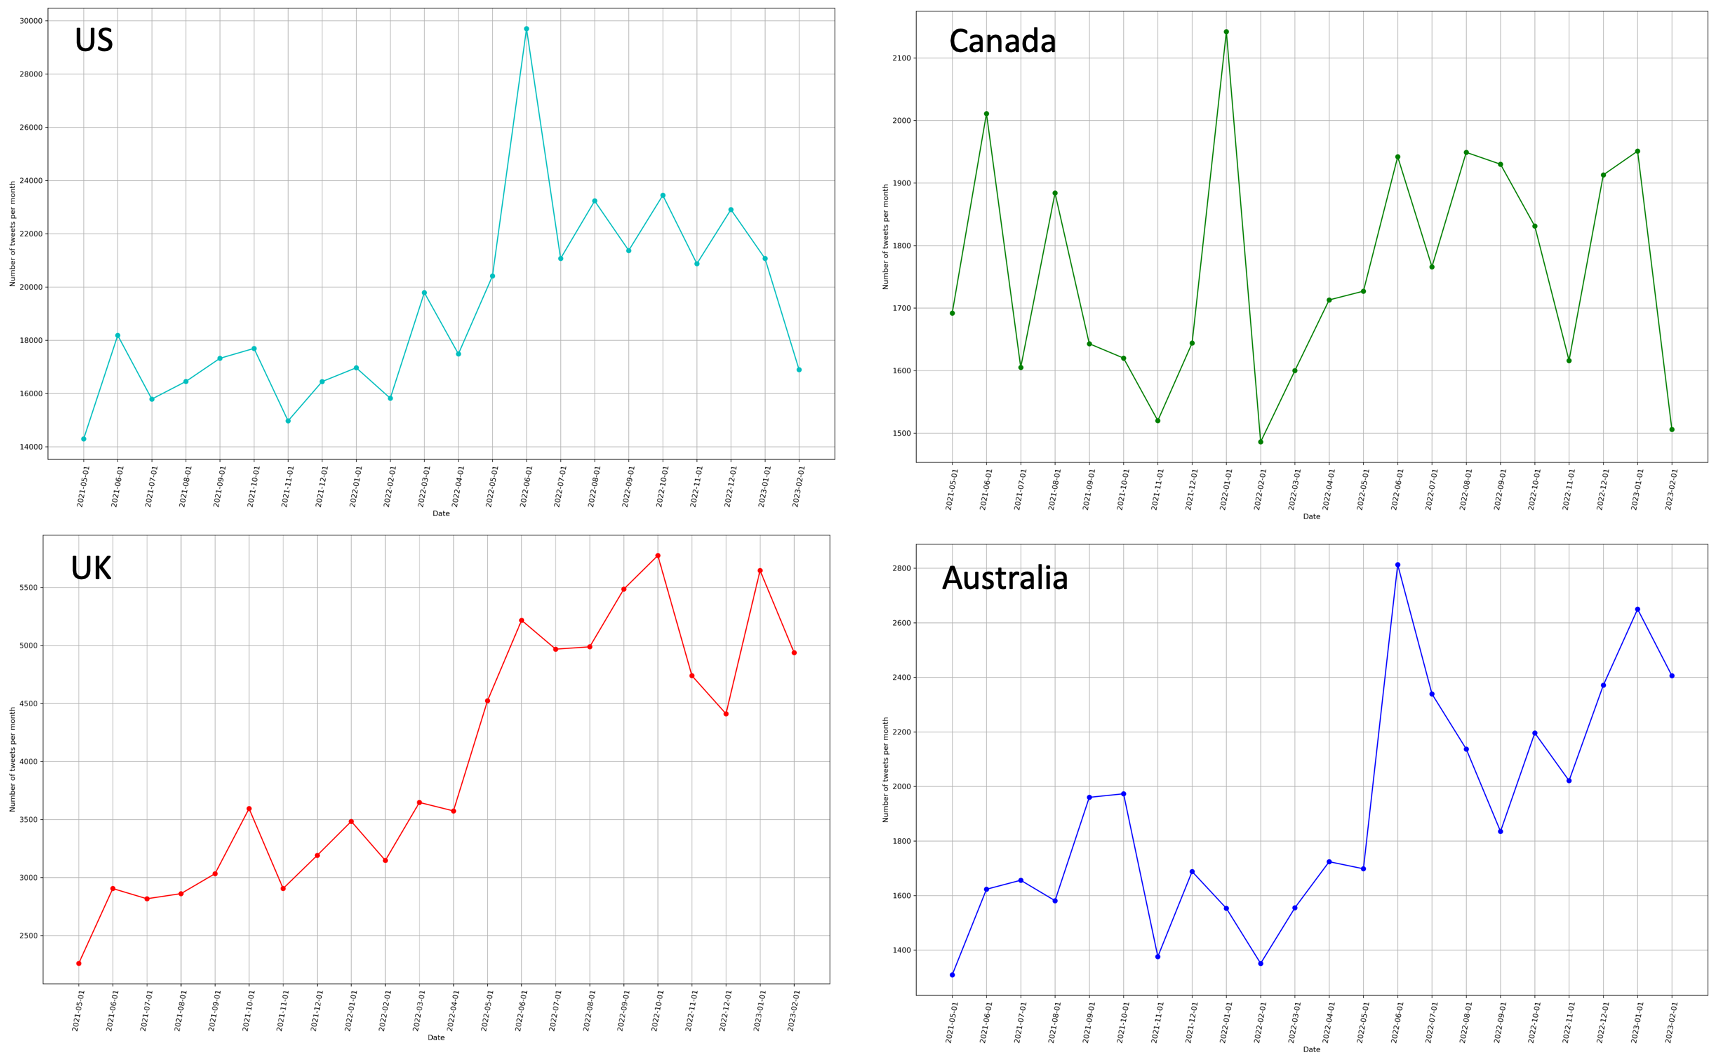


**Fig S1. Temporal trend in the prevalence of e-cigarette-related tweets in four countries.**

**
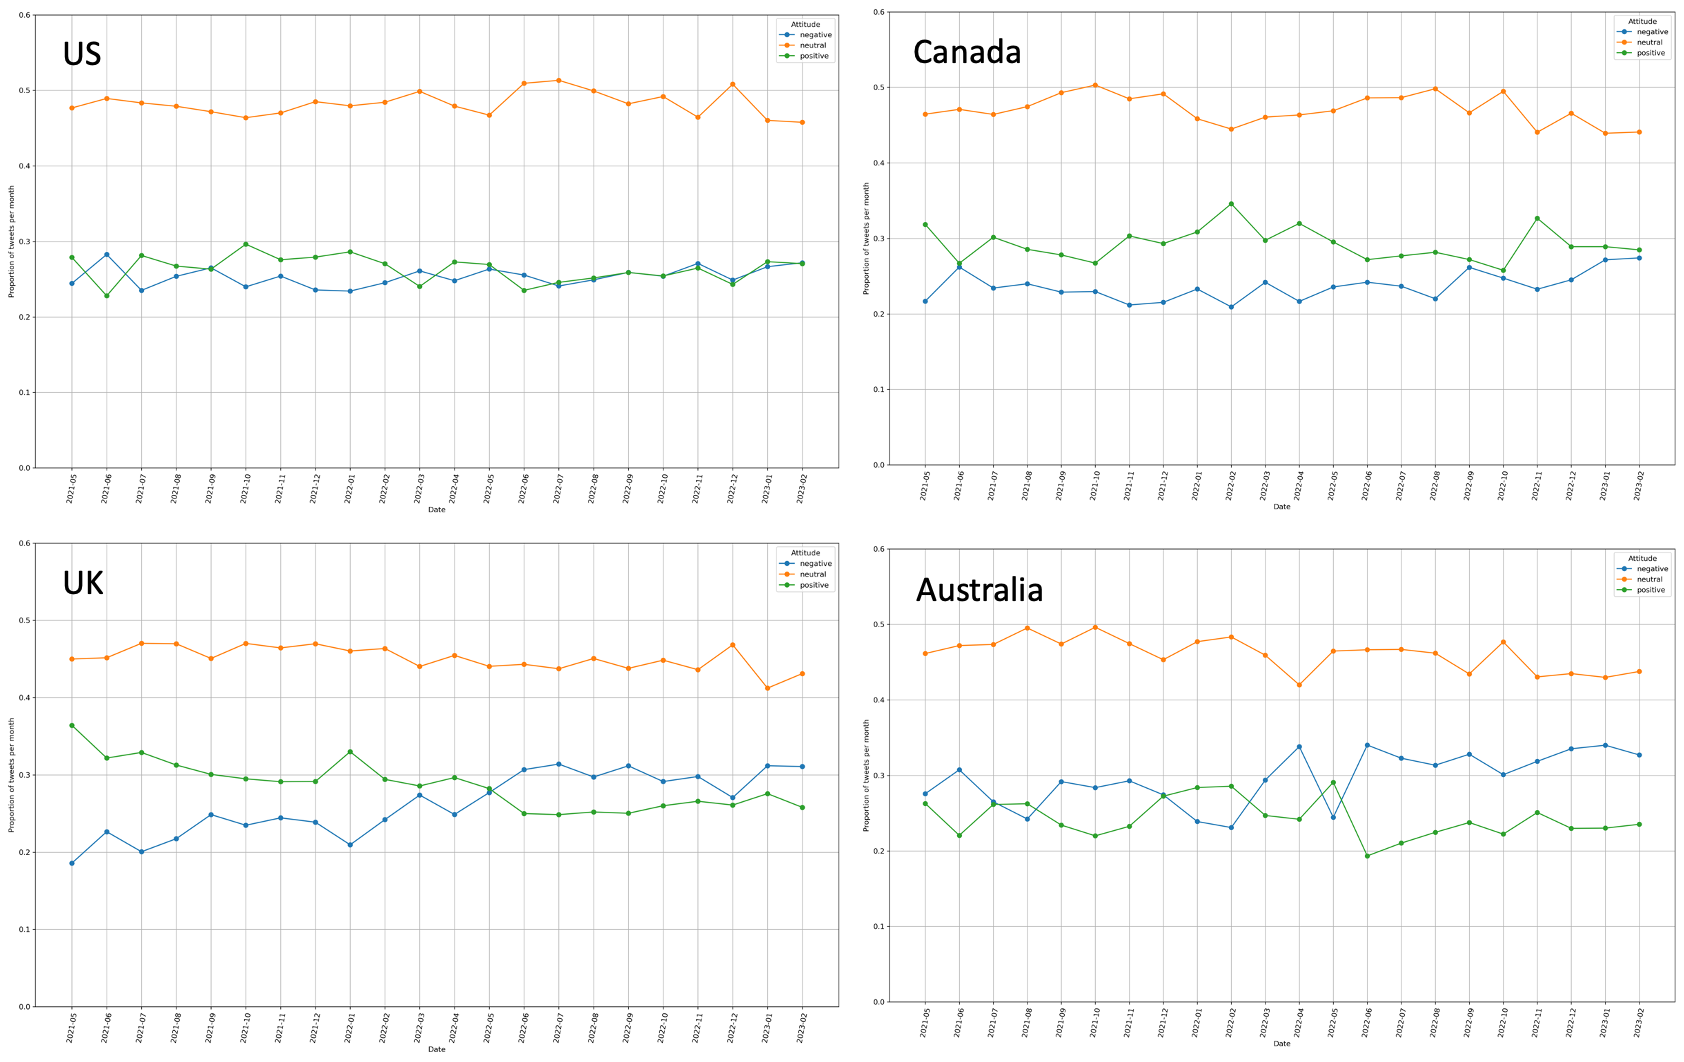
**

**Figure S2. Temporal trend in the proportion of tweets with different sentiments toward e-cigarettes in four countries.**

**
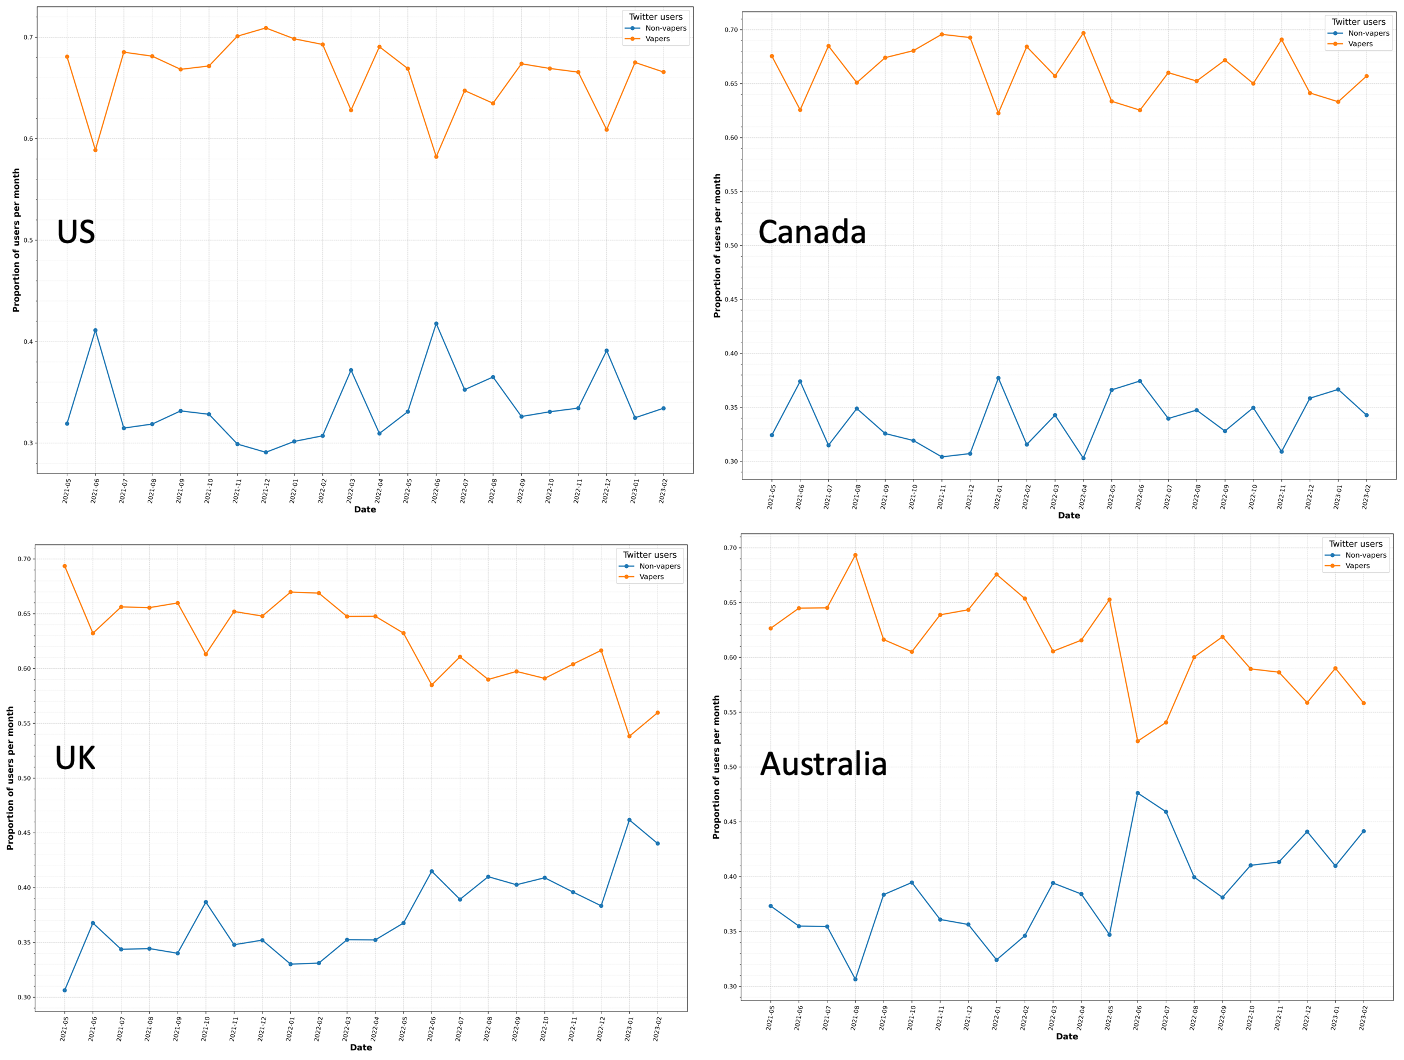
**

**Figure S3. Relative prevalence of vapers and non-vapers among Twitter users posting e-cigarette-related tweets in four countries.**

**
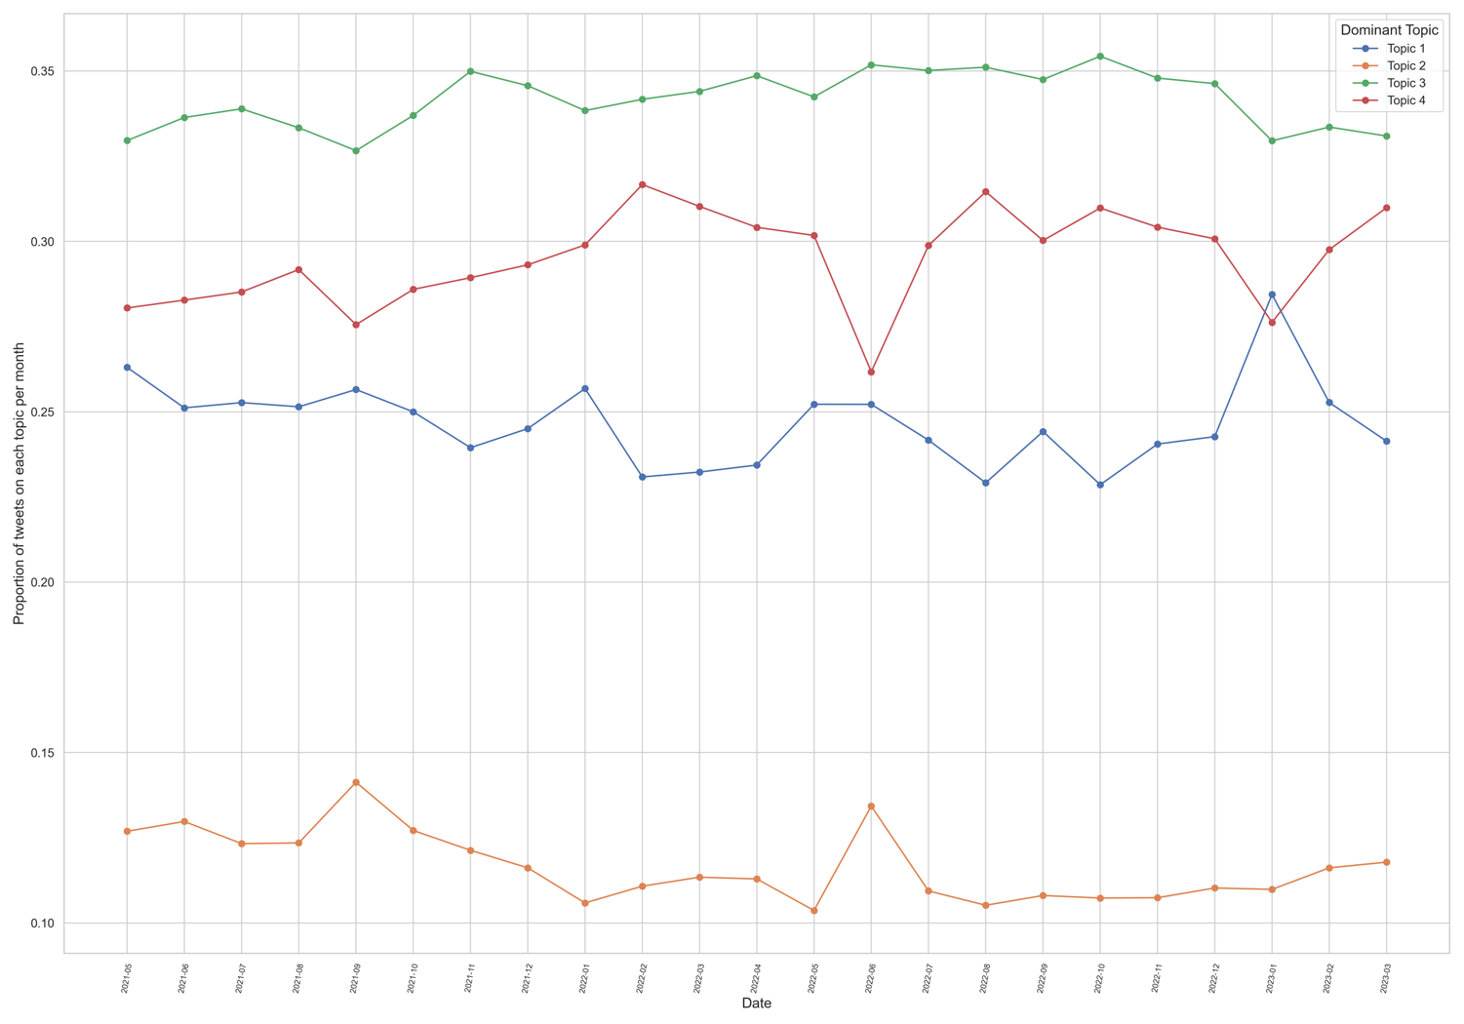
**

**Figure S4. The relative prevalence of main topics in tweets with a positive sentiment.**

**
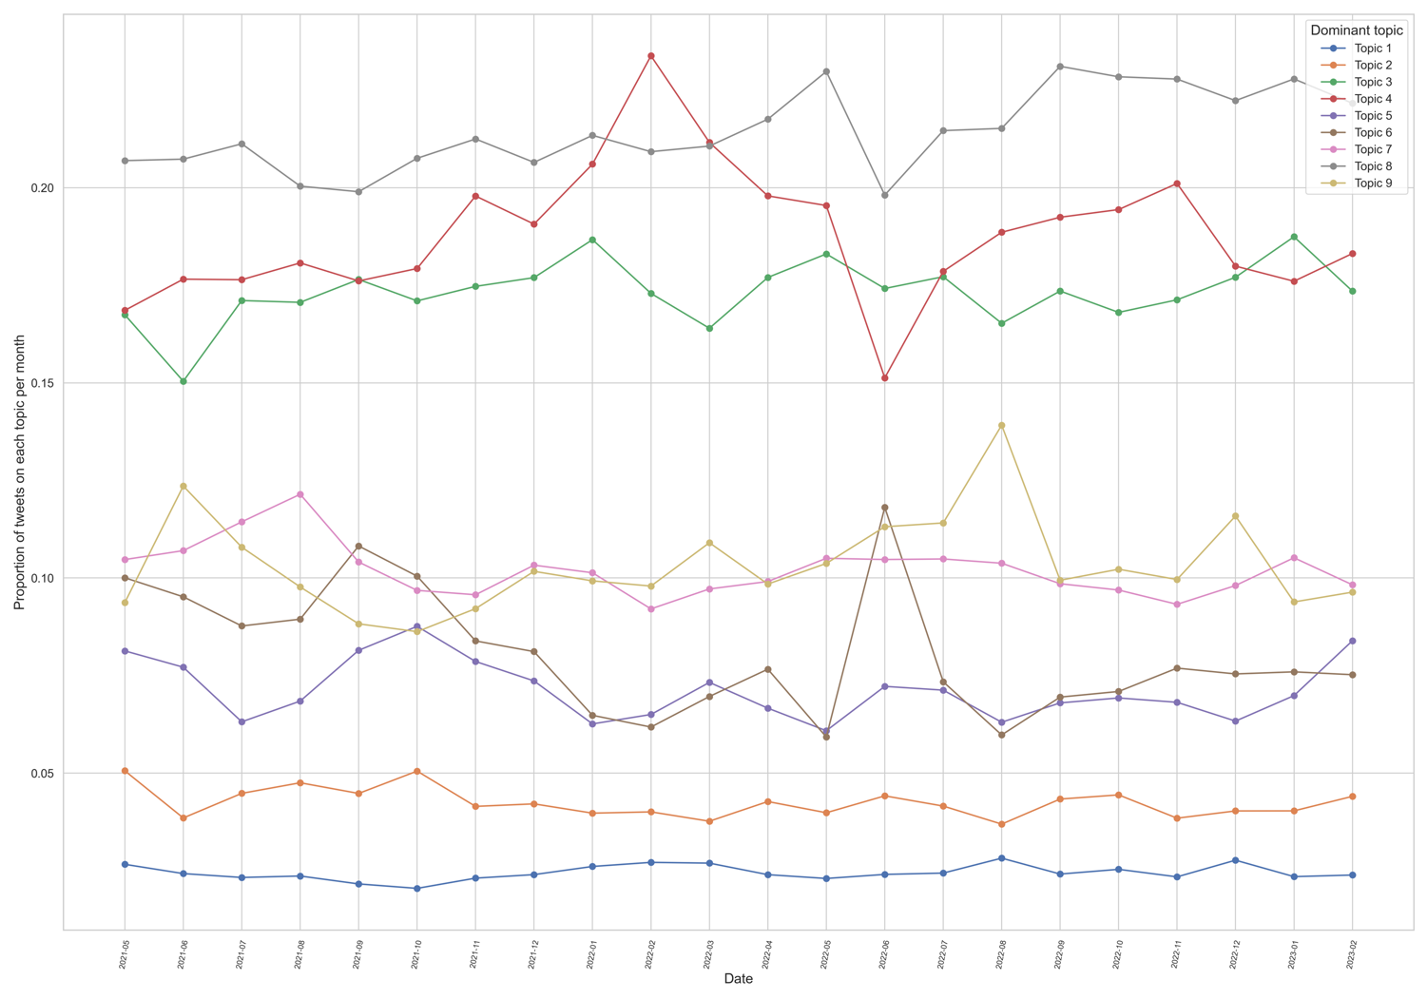
**

**Figure S5. The relative prevalence of main topics in tweets with a negative sentiment.**
